# Supplementary material for: Ovalbumin-modified nanoparticles increase the tumor accumulation by a tumor microenvironment-mediated “giant”
Source: Royal Society of Chemistry journal article supplement (doi:10.1039/d0tb00542h), 2020-01-01
Supplement: d0tb00542h1.pdf [file d0tb00542h1.pdf]

## Supporting Information

# Ovalbumin-modified Nanoparticles Increases the Tumor Accumulation by Tumor Microenvironment-Mediated “Giant”

*Jie Zhou,<sup>\*,†,‡</sup> Shizhen Geng,<sup>†</sup> Qiaolei Wang,<sup>†</sup> Qianwen Yin,<sup>†</sup> Rui Lou,<sup>†</sup> Liuliu Wei,<sup>†</sup>  
Yuncong Wu,<sup>†</sup> Bin Du,<sup>†,‡</sup> Hanchun Yao,<sup>†,‡</sup>*

<sup>†</sup> School of Pharmaceutical Sciences, Zhengzhou University, Zhengzhou 450001,  
China

<sup>‡</sup> Key Laboratory of Targeting Therapy and Diagnosis for Critical Diseases, Henan  
Province, Zhengzhou 450001, China

### Corresponding Author

E-mail: jie\_0822@163.com

E-mail: dubinpaper@sina.com

E-mail: yhchpaper@sina.com

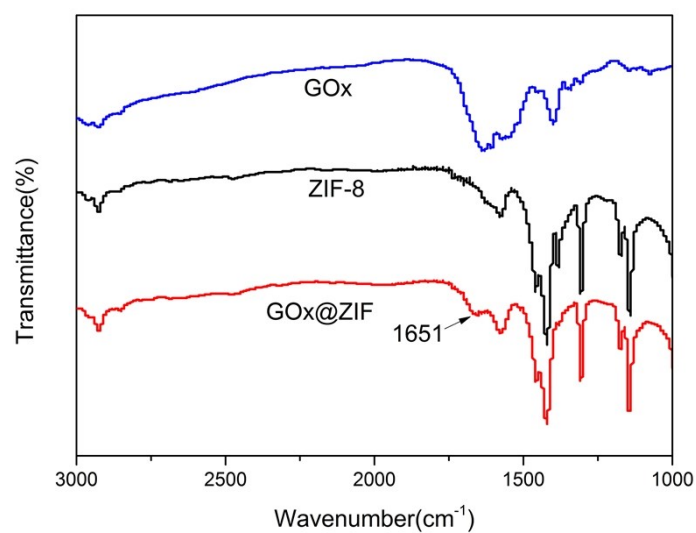

Fig. S1. FTIR spectra of different preparations

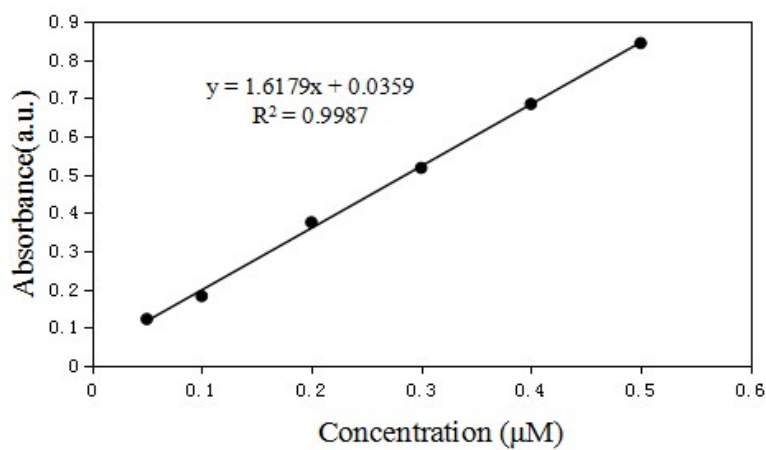

Fig. S2. The standard curve of BSA for BCA Protein Assay Kit.

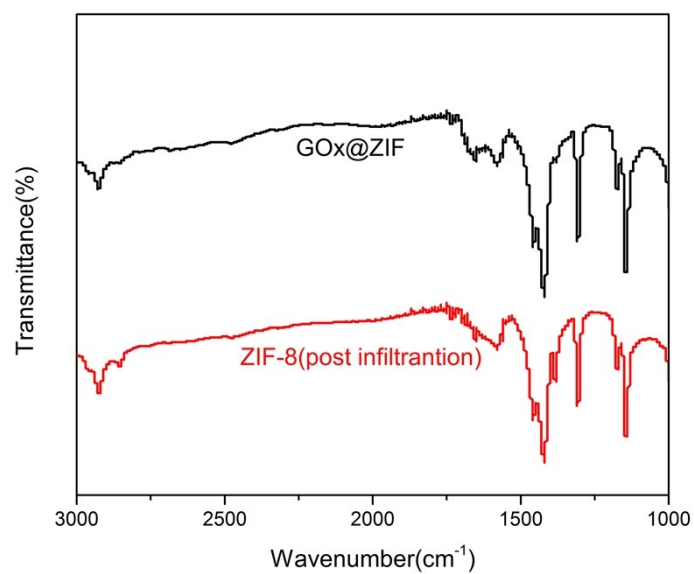

Fig. S3. FTIR spectra of GOx@ZIF, ZIF-8 post incubated with GOx after washing.

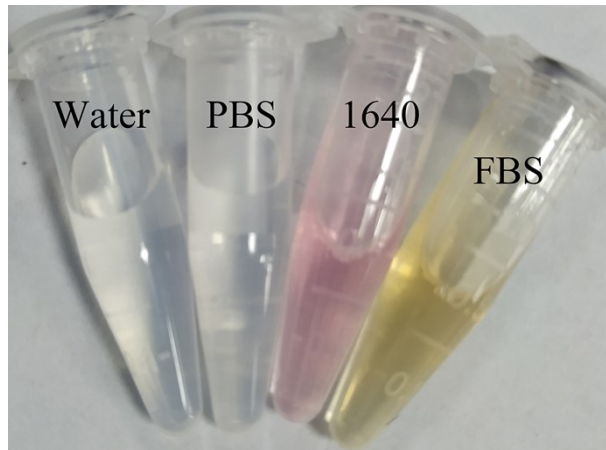

Fig. S4. Digital Photo of the GOx@ZIF-OVA dispersed in DI water, PBS, 1640 culture medium and FBS for 24 h.

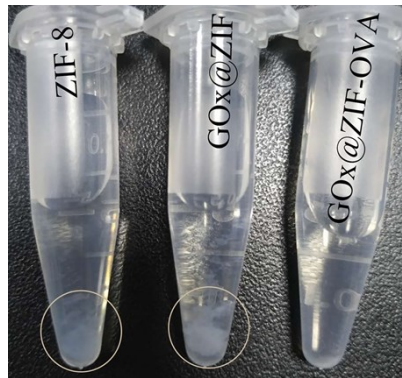

Fig. S5. Digital photos of ZIF-8, GOx@ZIF and GOx@ZIF-OVA at pH 5.0 after 24 h.

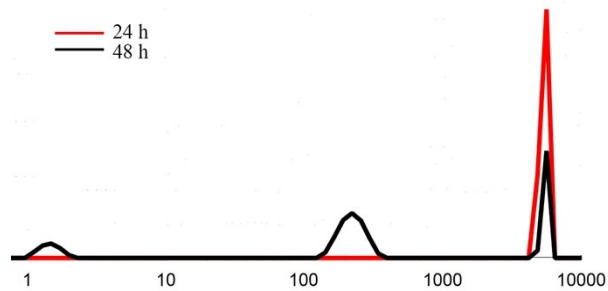

Fig. S6. The particle size of GOx@ZIF-OVA at pH 5.0 after 24 and 48 h.

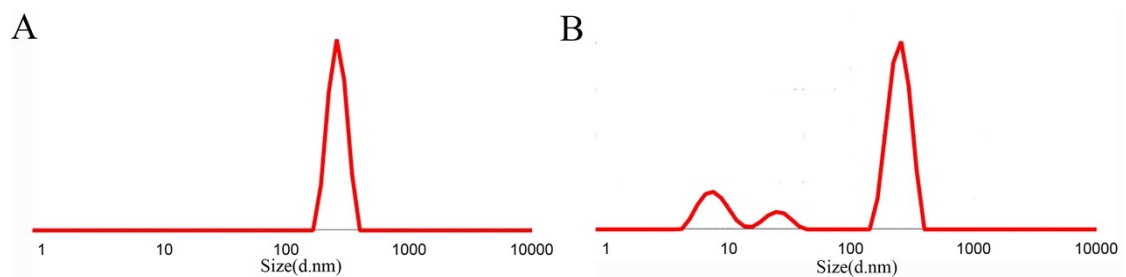

Fig. S7. The particle size of GOx@ZIF-BSA at pH (A) 7.4 and (B) 5.0.

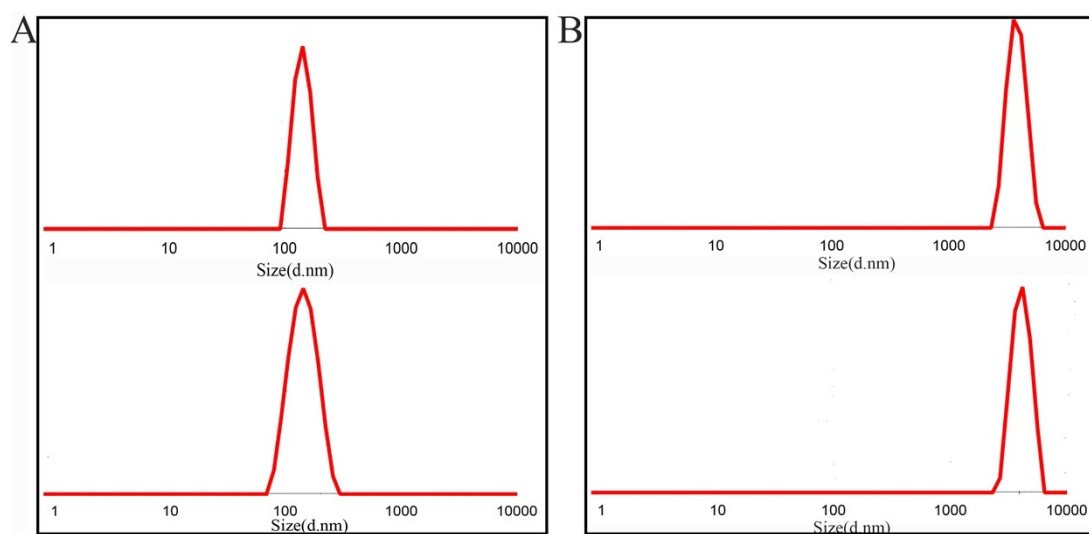

Fig. S8. After incubation with BSA, the particle size of GOx@ZIF-OVA at pH (A) 7.4 and (B) 5.0.

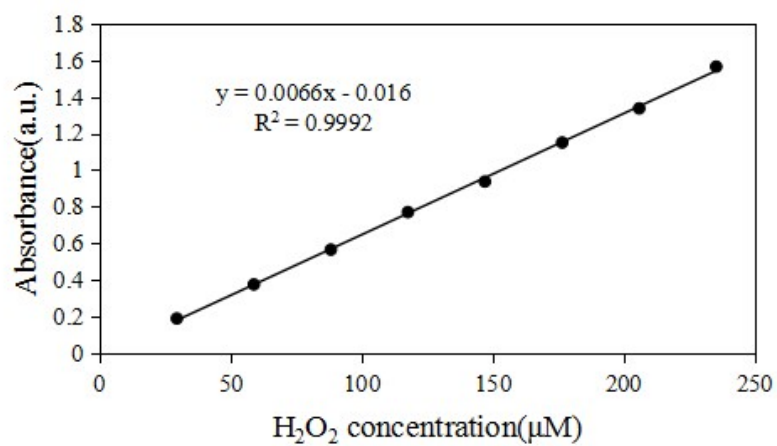

Fig. S9. The standard curve of H<sub>2</sub>O<sub>2</sub> by UV-vis absorbance at 400 nm with titanium potassium oxalate.

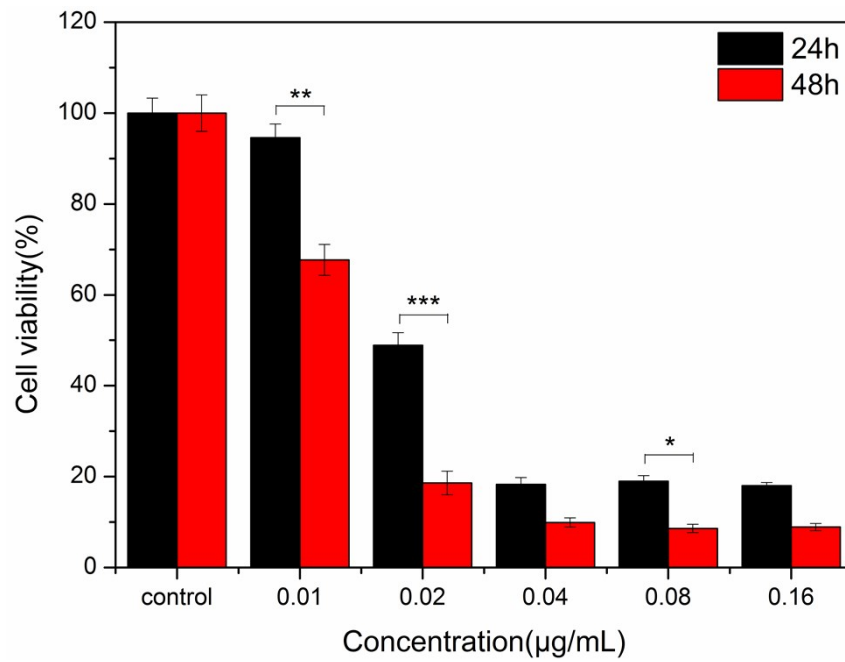

Fig. S10. Cytotoxicity test. Cell viabilities of 4T1 cells incubated with GOx at different concentrations for 24 and 48 h (n=6). \*  $P < 0.05$ , \*\* $P < 0.01$ , \*\*\* $P < 0.001$ .

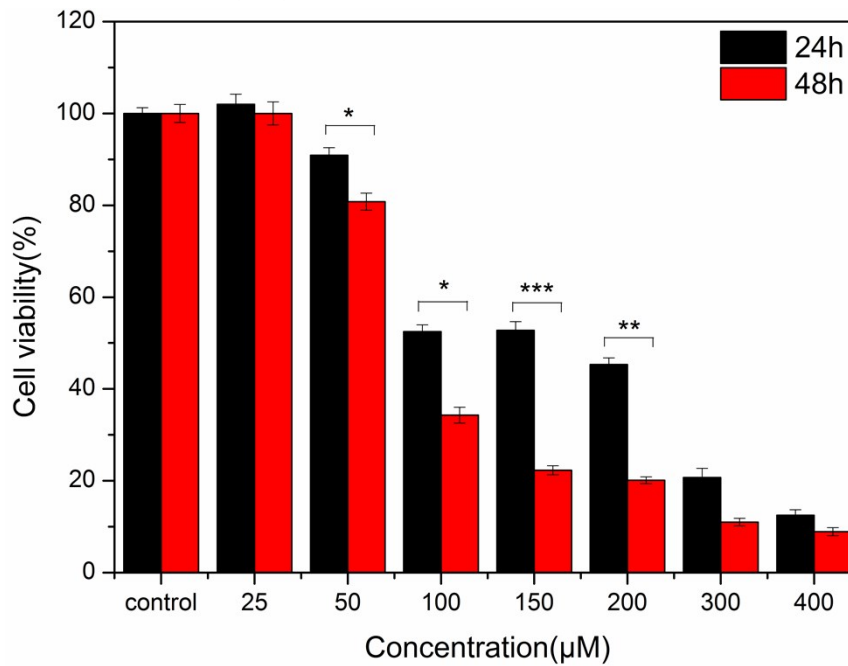

Fig. S11. Cytotoxicity test. Cell viabilities of 4T1 cells incubated with H<sub>2</sub>O<sub>2</sub> at different concentrations for 24 and 48 h (n=6). \*  $P < 0.05$ , \*\* $P < 0.01$ , \*\*\* $P < 0.001$ .

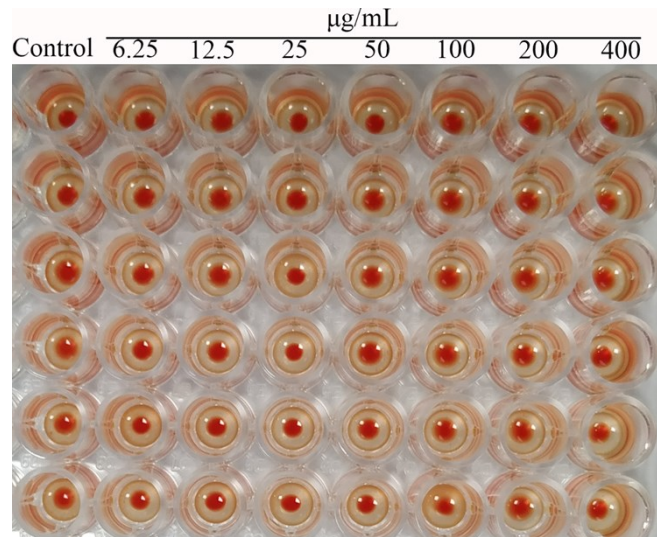

Fig. S12. Hemagglutination assay of the GOx@ZIF-OVA. The control group was treated by PBS only. Negative result forms red dot in the center, while positive result shows uniform reddish color across the entire well.

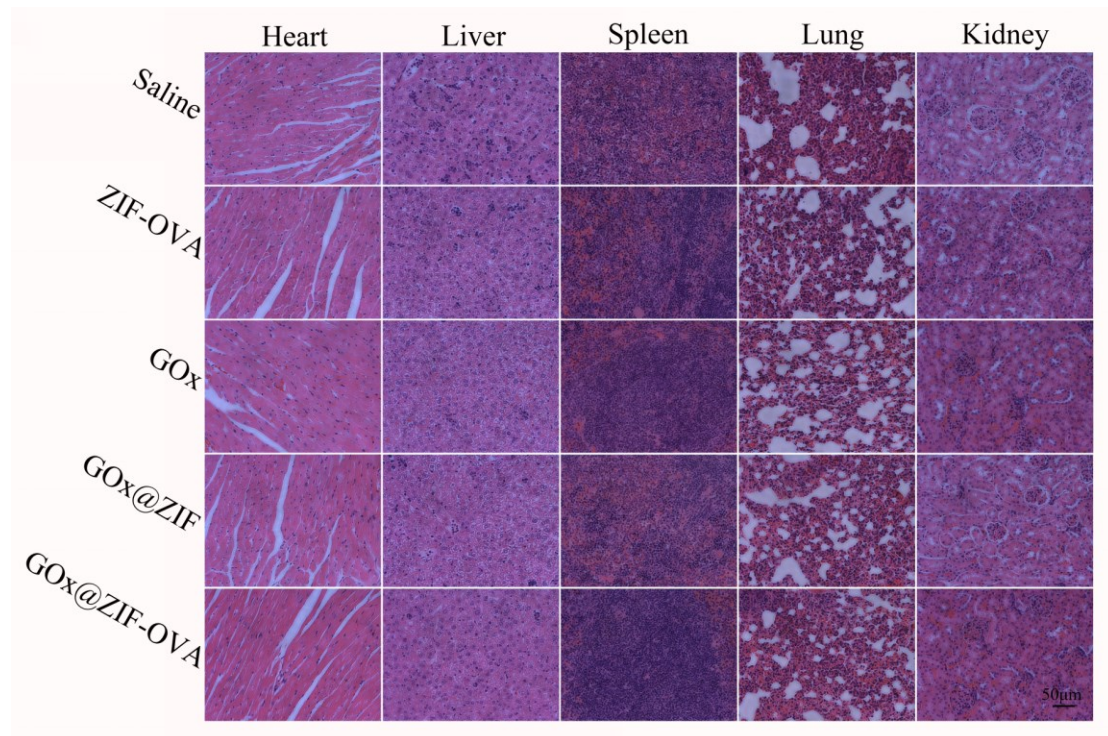

Fig. S13. H&E staining of major organs and tumors in different groups.

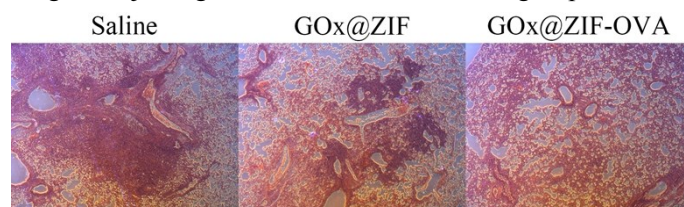

Fig. S14. H&E staining results of lung tissues in already formed metastatic model (n = 6).
